# Supplementary material for: Particle-attachment crystallization facilitates the occlusion of micrometer-sized Escherichia coli in calcium carbonate crystals with stable fluorescence
Source: Royal Society of Chemistry journal article supplement (doi:10.1039/d0tb01978j), 2020-01-01
Supplement: d0tb01978j1.pdf [file d0tb01978j1.pdf]

## Supporting Information

### Particle Attachment Crystallization Facilitates the Occlusion of Micrometer-sized *Escherichia Coli* in Calcium Carbonate Crystals with Stable Fluorescence

Mengqi Zhang,<sup>a†</sup> Hang Ping,<sup>a†</sup> Weijian Fang,<sup>a</sup> Fuqiang Wan,<sup>a</sup> Hao Xie,<sup>b</sup> Zhaoyong Zou<sup>\*a</sup> and Zhengyi Fu<sup>\*a</sup>

<sup>a</sup> State Key Laboratory of Advanced Technology for Materials Synthesis and Processing, Wuhan University of Technology, Wuhan, 430070, China.

<sup>b</sup> School of Chemistry, Chemical Engineering, and Life Science, Wuhan University of Technology, Wuhan, 430070, China.

† These authors contributed equally.

\* Corresponding authors, E-mail: zyfu@whut.edu.cn; zzou@whut.edu.cn

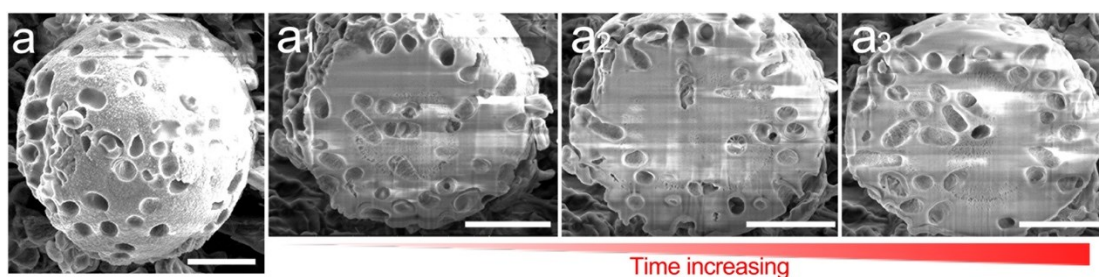

Figure S1. (a) Focused ion beam (FIB) etching of a single *E. coli*/vaterite crystal. Scale bar is 2  $\mu\text{m}$  in a, 2.5  $\mu\text{m}$  in a1-a3.

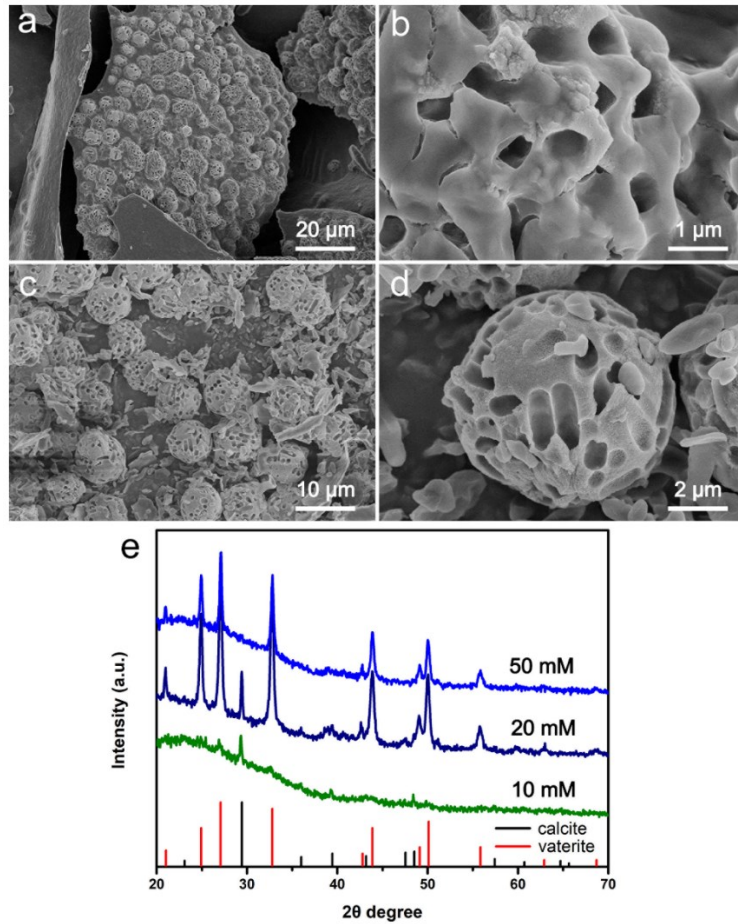

Figure S2. SEM images of composites under the concentration of (a-b) 10 mM and (c-d) 20 mM. (e) XRD patterns of composites with different concentrations.

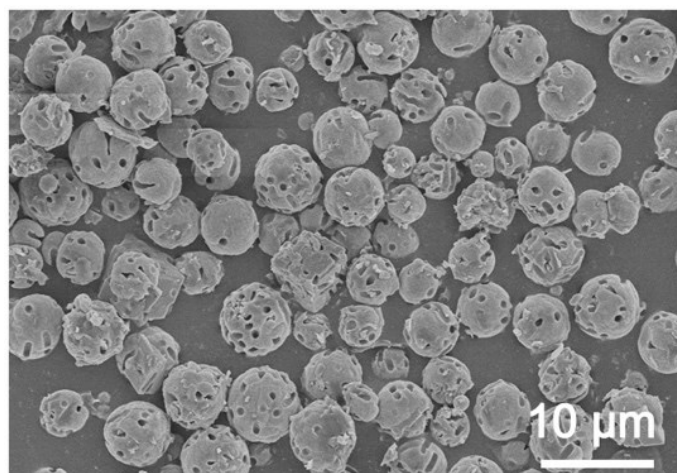

Figure S3. SEM image of *E. coli*/vaterite after mineralization for 10 min.

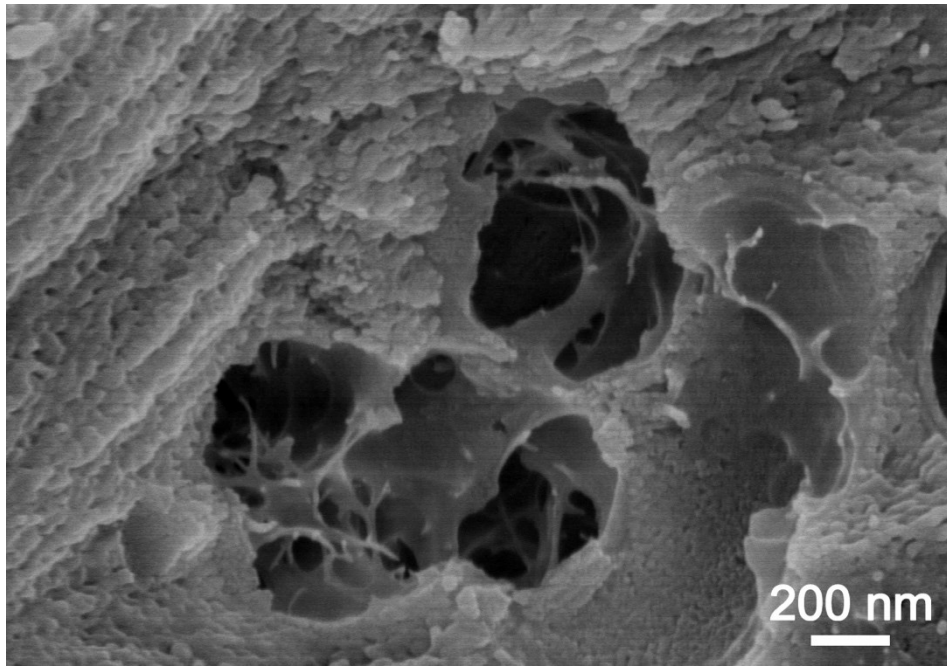

Figure S4. SEM image of fiber-like structure within the host crystal.

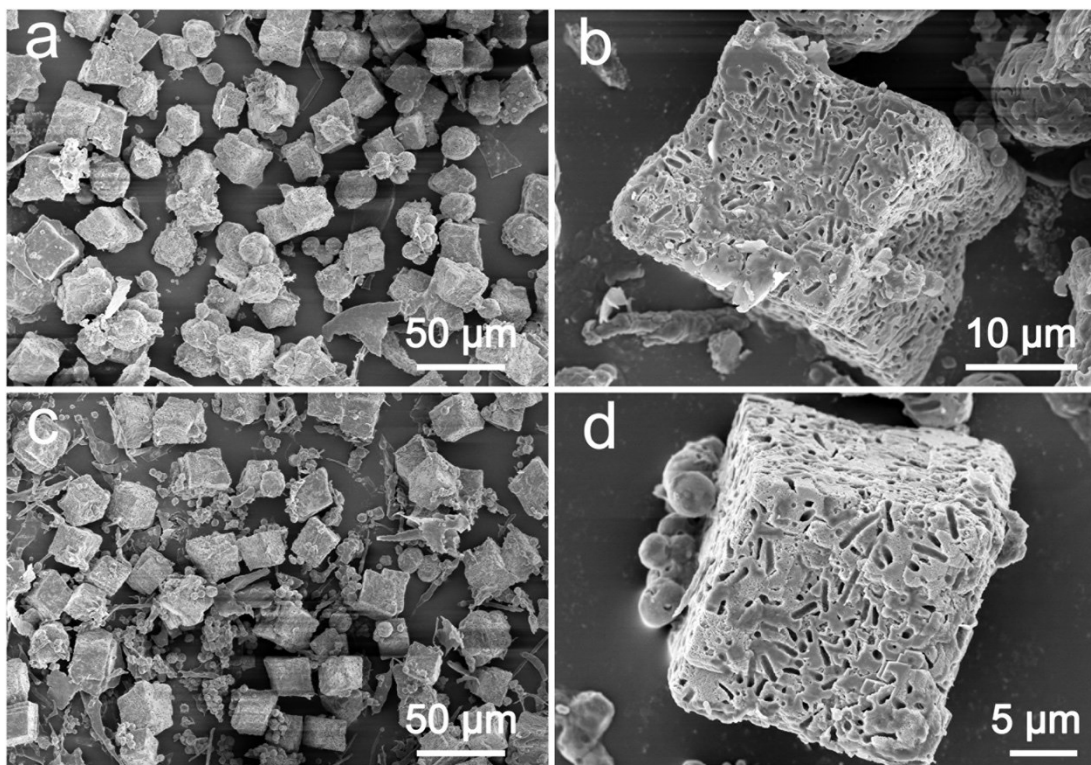

Figure S5. SEM images of *E. coli*/calcite composites after 5 min (a-b) and 10 min (c-d) of mineralization.

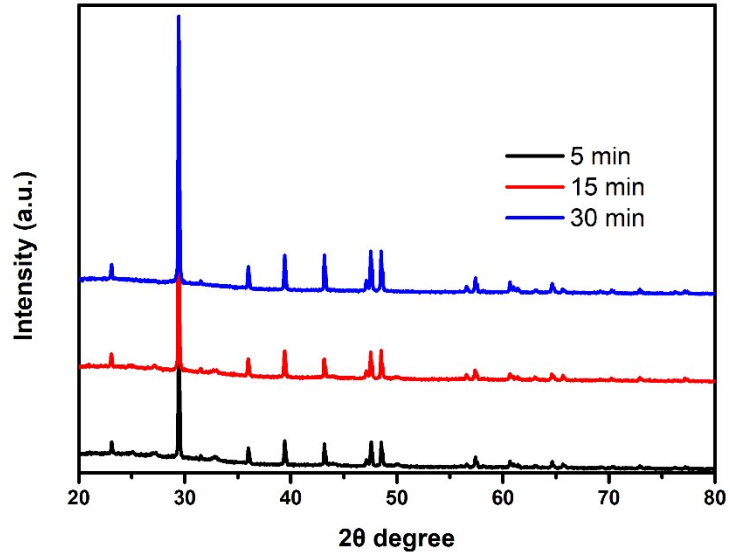

Figure S6. XRD patterns of *E. coli*/calcite composites.

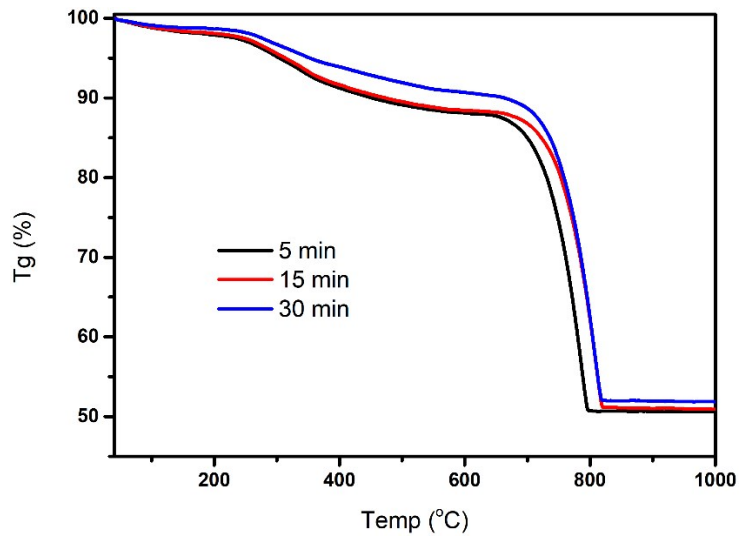

Figure S7. Thermogravimetric curves of *E. coli*/calcite composites.

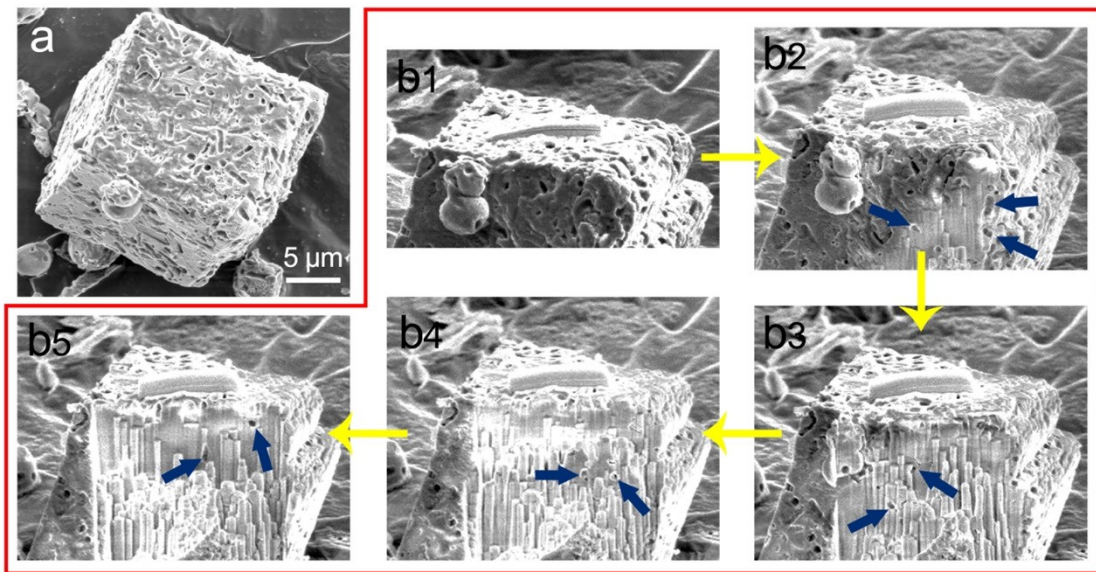

Figure S8. (a) SEM image of *E. coli*/calcite (top view). (b) Focused ion beam (FIB) etching of single calcite crystal (side view). The bacteria pores were marked by blue arrows.

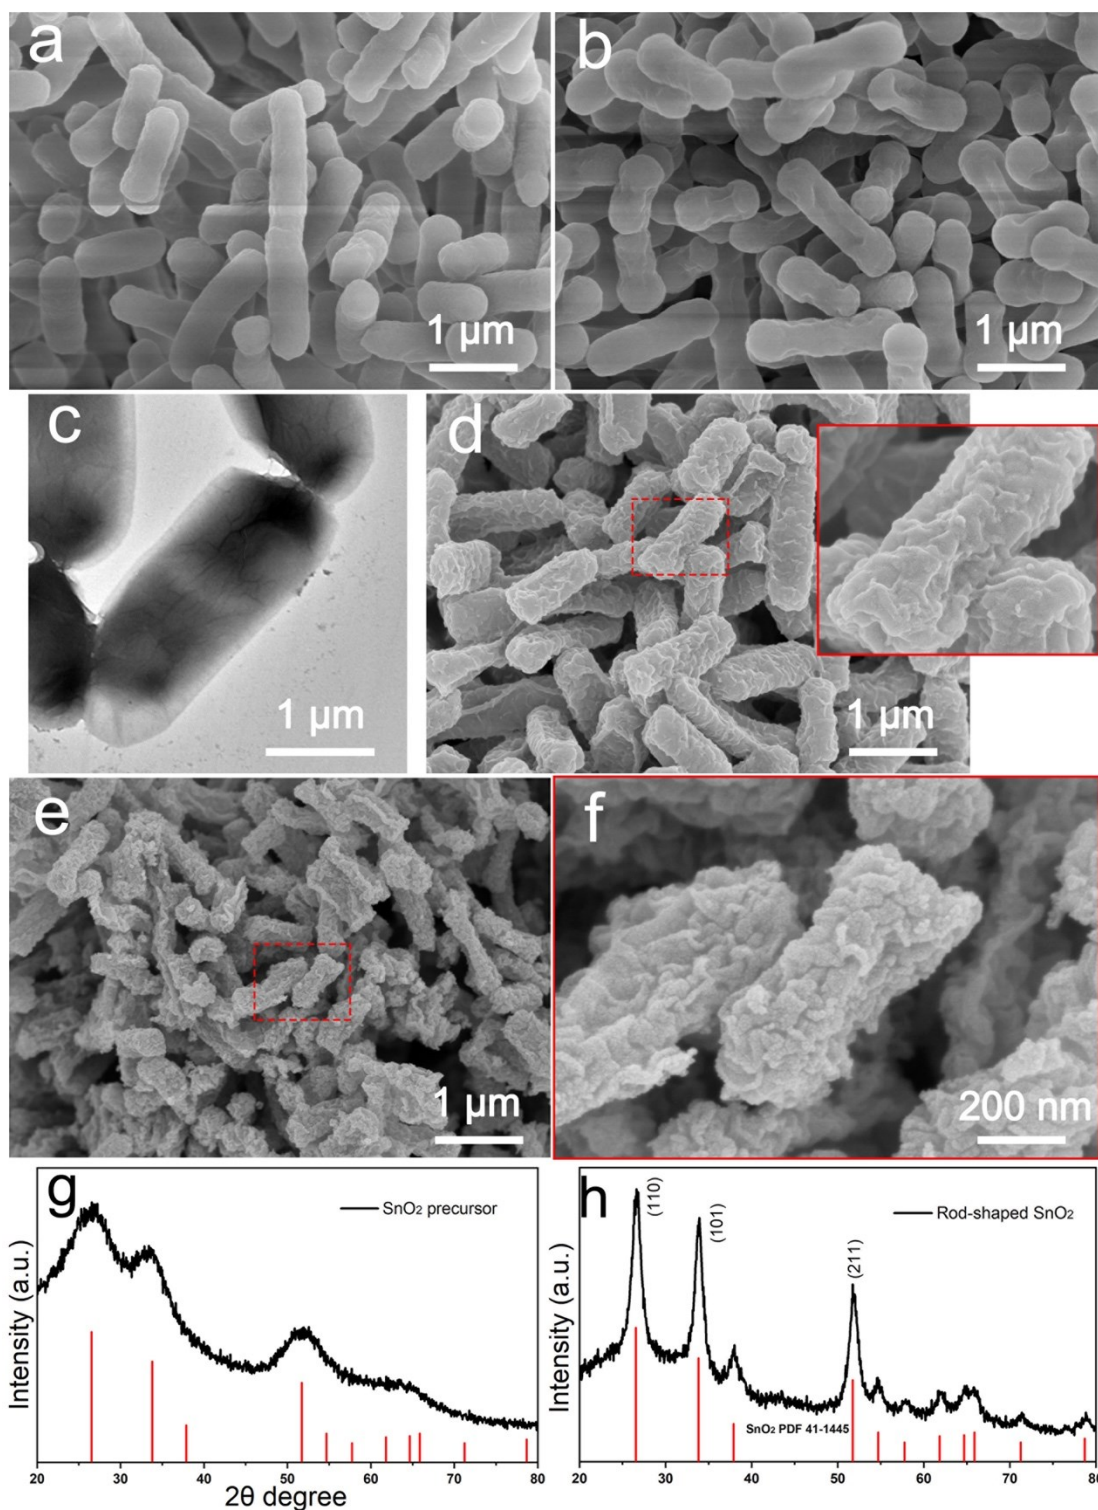

Figure S9. Morphology of various rod-shaped guest species with different surface structure and composition. (a) SEM image of native *E. coli*, (b) SEM image of 5R5 modified *E. coli*, (c) TEM image of *E. coli* with flagellum, (d) SEM image of  $\text{SnO}_2$  precursor deposited *E. coli*. (e-f) SEM images of rod-shaped  $\text{SnO}_2$ . (g) XRD pattern of  $\text{SnO}_2$  precursor, (h) XRD pattern of Rod-shaped  $\text{SnO}_2$ .

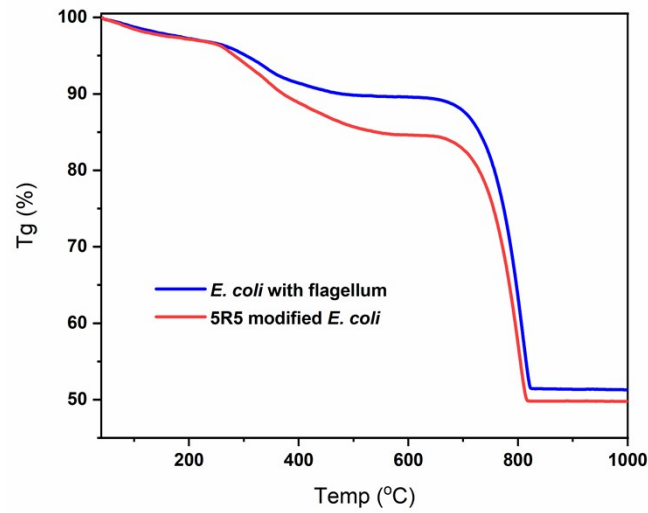

Figure S10. Thermogravimetric curves of guest/vaterite composites after 10 min of mineralization.

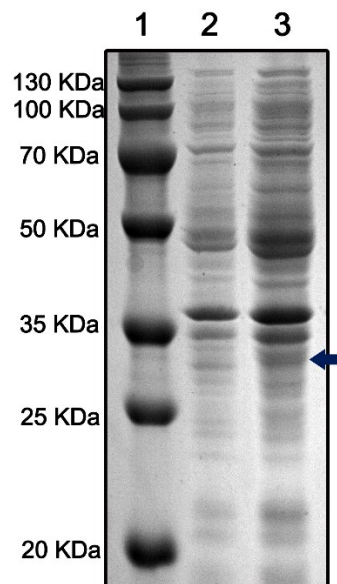

Figure S11. SDS-PAGE of GFP-modified *E. coli*. Lane 1, molecular weight marker; Lane 2, lysate of uninduced cells; Lane 3, lysate of IPTG-induced cells. The target band was marked by blue arrow.

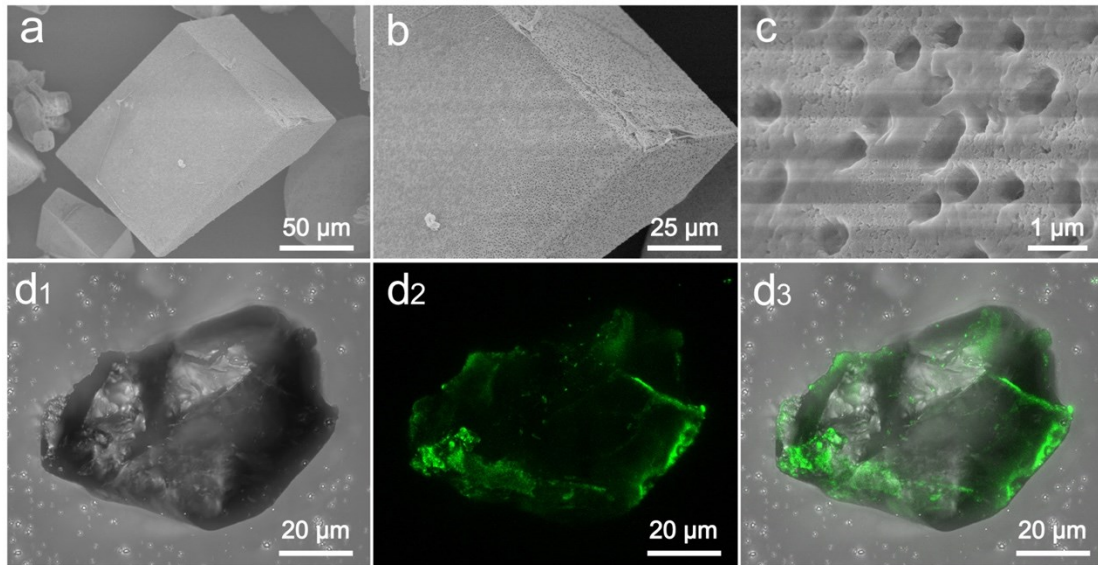

Figure S12. (a-c) SEM images of products synthesized by vapor diffusion method. (d1-d3) Confocal fluorescence images.

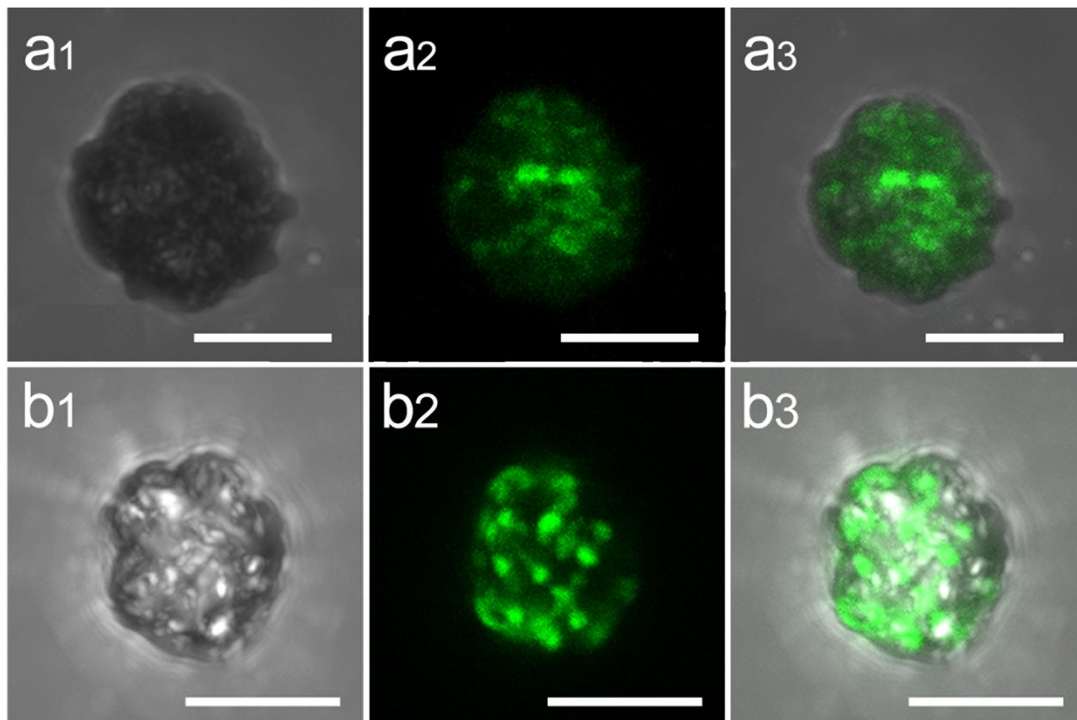

Figure S13. Confocal fluorescence images of GFP-*E. coli*/vaterite composite after (a) 3 months, (b) 6 months. Scale bar is 5 μm.



Table S1 FTIR data of  $\nu_2$  and  $\nu_4$  in *E. coli*/vaterite composites.

|                   | $\nu_2$ (876 $\text{cm}^{-1}$ ) | $\nu_4$ (745 $\text{cm}^{-1}$ ) | $\nu_4$ (713 $\text{cm}^{-1}$ ) |
|-------------------|---------------------------------|---------------------------------|---------------------------------|
| Transmittance (%) | 45.34                           | 86.6                            | 93.19                           |
| Absorbance        | 0.343                           | 0.0625                          | 0.0306                          |

Table S2 The mass loss during different temperature region.

|                          | 40-200 °C | 200-600 °C | 600-1000 °C | Total loss |
|--------------------------|-----------|------------|-------------|------------|
| <i>E. coli</i> /ACC      | 18.2 %    | 12.9 %     | 28.8 %      | 59.9 %     |
| <i>E. coli</i> /vaterite | 3.8 %     | 16.0 %     | 34.0 %      | 53.8 %     |

Table S3. The multi-exponential lifetime ( $T_i$ ) and preexponential ( $\alpha_i$ ) for lifetime of GFP-*E. coli*/CaCO<sub>3</sub> composites.

|                               | $\alpha_1$ | $T_1$ | $\alpha_2$ | $T_2$   |
|-------------------------------|------------|-------|------------|---------|
| GFP- <i>E. coli</i> /vaterite | 3.435      | 1.222 | 0.0747     | 19.029  |
| GFP- <i>E. coli</i> /calcite  | 3.630      | 1.479 | 0.0035     | -0.0017 |
